# Supplementary material
Source: PubMed Central journal article supplement (PMC4028955)
Supplement: NIHMS571955-supplement-1.pdf [file NIHMS571955-supplement-1.pdf]

Supplementary info DRa1

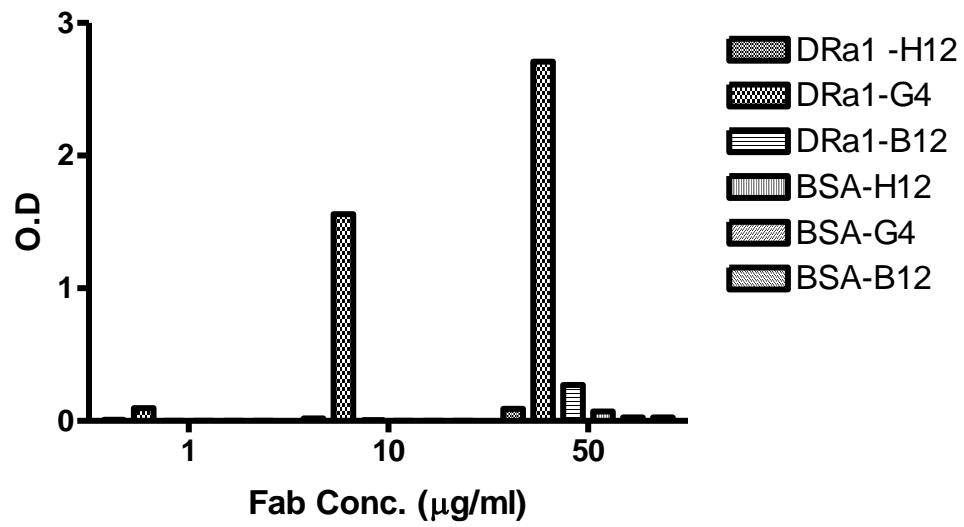

**Supplementary Figure 1. Fab G4 specificity for DR $\alpha$ 1 construct.** The binding of different Fabs (H12, G4 and B12) to DR $\alpha$ 1 or BSA was measured by ELISA assay for different concentrations.

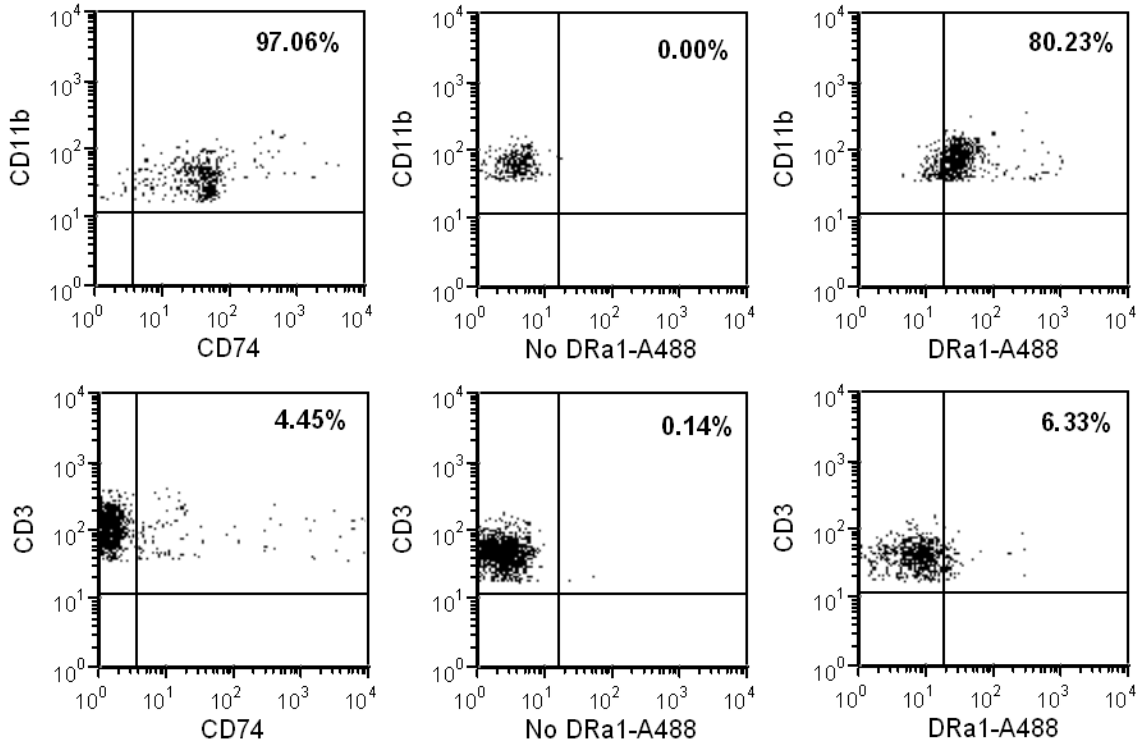

**Supplementary Figure 2. Binding of DR $\alpha$ 1 to CD74 expressing CD11b<sup>+</sup> monocytes.** Cells from DR\*1501-Tg mice were analyzed for the surface expression of CD74 on CD11b<sup>+</sup> or CD3 cells. Cells were also incubated with 5mg DR $\alpha$ 1-Alexa488 for 1 h at 37°C and analyzed for DR $\alpha$ 1-A488 binding to CD11b<sup>+</sup> or CD3 cells.

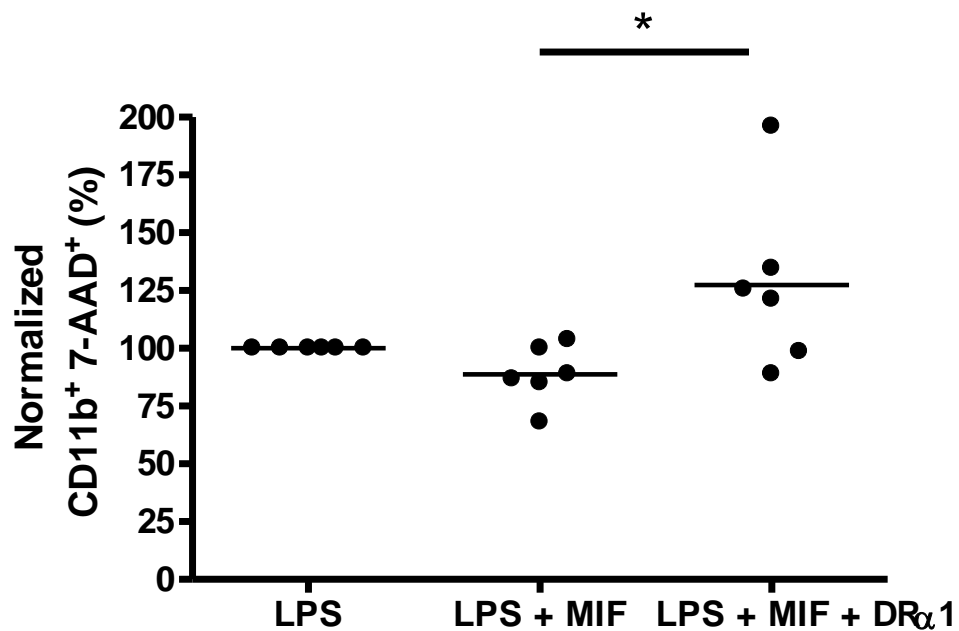

**Supplementary Figure 3. DR $\alpha$ 1 modulates MIF anti-apoptotic effects.** Human PBMC from 6 HC subjects were stimulated with 10ng/ml LPS with or without 100ng/ml rhMIF and treated with 10 $\mu$ g/ml DR $\alpha$ 1. The cells were incubated at 37°C for 24 h and analyzed for 7-AAD staining on CD11b<sup>+</sup> monocytes. Results were normalized to the LPS alone treatment of every subject separately. \*p<0.05, One-way Kruskal-Wallis ANOVA with Dunn's multiple comparisons post test.

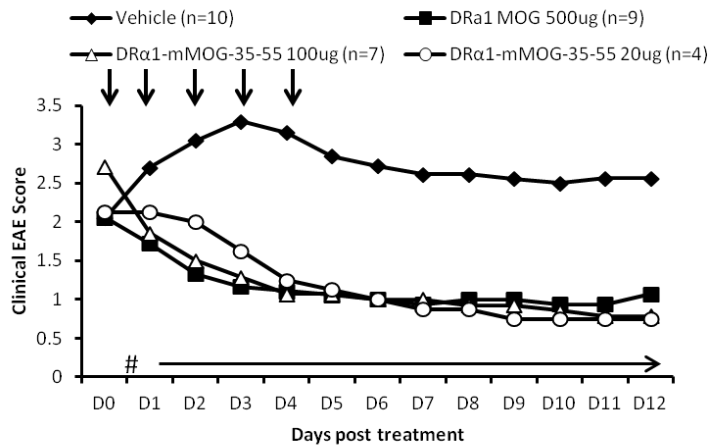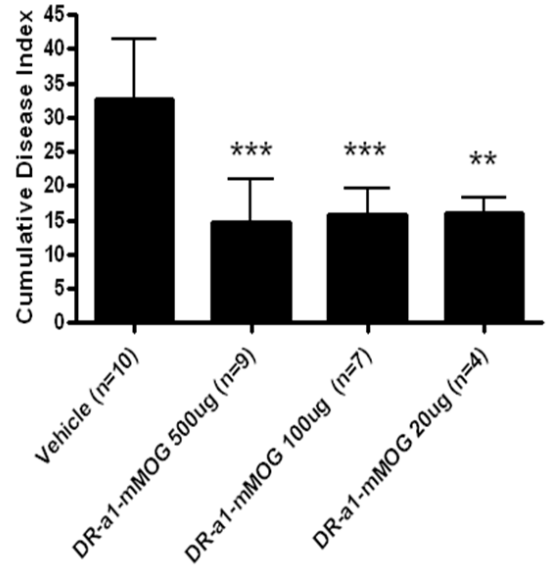

**Supplementary Figure 4. DR $\alpha$ 1– MOG-35-55 treats clinical EAE.** DR\*1501 mice with EAE were treated at onset with Vehicle (5 daily treatments), DR $\alpha$ 1-MOG-35-55 (500 $\mu$ g X 5), DR $\alpha$ 1-MOG-35-55 (100 $\mu$ g X 5) and DR $\alpha$ 1-MOG-35-55 (20 $\mu$ g X 5). *left*: Daily mean clinical EAE disease scores. #  $p < 0.001$ , DR $\alpha$ 1- MOG-35-55(500 $\mu$ g), DR $\alpha$ 1- MOG-35-55(100 $\mu$ g) and DR $\alpha$ 1- MOG-35-55(20 $\mu$ g ) vs. Vehicle. *right*: Statistical comparisons of cumulative disease indices (CDI): \*\* $p < 0.01$ ; \*\*\* $p < 0.0001$ . Daily mean scores were analyzed by Mann Whitney U and mean CDI by one way ANOVA with Tukey post-test.
